# Supplementary material for: Enhancing treatment of osteoarthritis knee pain by boosting expectancy: A functional neuroimaging study
Source: PubMed Central journal article supplement (PMC5984593; doi:10.1016/j.nicl.2018.01.021), 2018-02-28

Supplementary Figure 1. Flow chart of the study

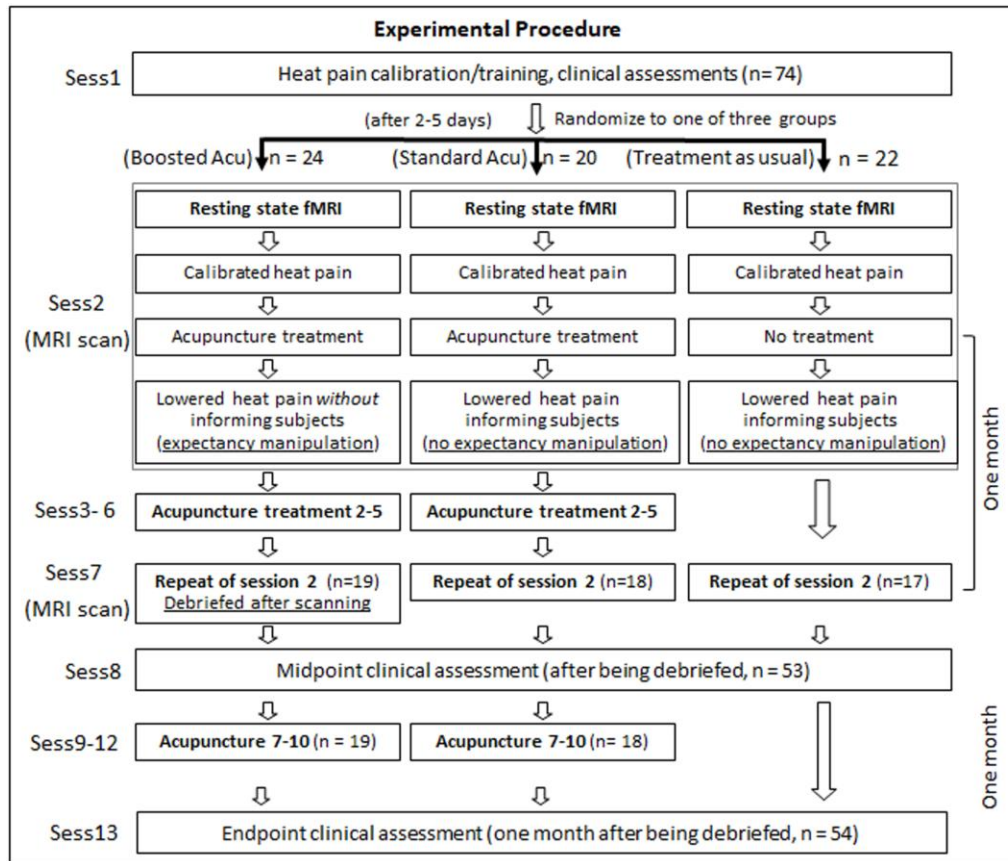

Supplement: mmc1.pdf [file mmc1.pdf]
